# Supplementary material for: Eukaryotic-like Ser/Thr Protein Kinases SpkC/F/K Are Involved in Phosphorylation of GroES in the Cyanobacterium Synechocystis
Source: PubMed Central journal article supplement — DNA Res. 2011 May 6;18(3):137–51. doi: 10.1093/dnares/dsr006 (PMC3111230; doi:10.1093/dnares/dsr006), 2011-05-06
Supplement: supp_dsr006_dsr006supp.pdf [file supp_dsr006_dsr006supp.pdf]

## SUPPLEMENTARY MATERIALS

### **Eukaryotic-like Ser/Thr protein kinases SpkC/F/K are involved in phosphorylation of GroES in the cyanobacterium *Synechocystis***

Anna Zorina, Natalia Stepanchenko, Maria Sinetova, Vladimir B. Panichkin, Galina V.

Novikova, Igor E. Moshkov, Vladislav V. Zinchenko, Sergey V. Shestakov, Iwane Suzuki,

Norio Murata, and Dmitry A. Los

#### **Mutation of *spk* genes**

***Synechocystis* strains used for mutation of *spk* genes.** A *Synechocystis* sp. PCC 6803 GS-strain<sup>30</sup> was used for mutation of all the *spk* genes, except the *spkA*. In this strain the *spkA* gene is spontaneously mutated by a frame shift.<sup>25</sup>

**The *spkB::Km<sup>r</sup>* mutant.** A DNA fragment of 893 bp that contained part of the *spkB* gene was amplified by PCR with the primers indicated in Table S1 and DNA from *Synechocystis* as template. The fragment was cloned into the pGEM<sup>®</sup>-T Easy vector (Promega). The resultant plasmid was digested with the restriction enzyme *Stu* I and the cleaved fragment was ligated with a Km<sup>r</sup> cassette that included the *aphA* gene from plasmid pUC4K.<sup>34</sup> This gene encodes aminoglycoside 3'-phosphotransferase, which confers resistance to kanamycin.

**The *spkC::Cm<sup>r</sup>* mutant.** A DNA fragment of 1,143 bp that contained part of the *spkC* gene was amplified by PCR with the primers indicated in Table S1 and DNA from *Synechocystis* as template. The fragment was cloned into the pGEM<sup>®</sup>-T vector. The resultant plasmid was digested with the restriction enzyme *Kpn* I and the cleaved fragment was ligated

with the  $\text{Cm}^r$  cassette that included the *cat* gene from plasmid pACYC184.<sup>35</sup> This gene encodes chloramphenicol acetyltransferase and confers resistance to chloramphenicol.

**The *spkD*:: $\text{Km}^r$  mutant.** A DNA fragment of 1,256 bp that contained part of the *spkD* gene was amplified by PCR with the primers indicated in Table S1 and DNA from *Synechocystis* as template. The fragment was cloned into the pT7Blue-T vector (Novagen). The resultant plasmid was used for insertion, with an EZ::TN™ <KAN-2> Tnp Transposome™ Kit (Epicentre), of a  $\text{Km}^r$  transposon that contained the same  $\text{Km}^r$  cassette as we used for mutation of the *spkB* gene. The location and orientation of insertion of the cassette were determined by sequencing DNA in the region that flanked the cassette.

**The *spkE*:: $\text{Gm}^r$  mutant.** A DNA fragment of 1,070 bp that contained part of the *spkE* gene was amplified by PCR with the primers indicated in Table S1 and DNA from *Synechocystis* as template. The fragment was cloned into the pGEM®-T. The resultant plasmid was digested with the restriction enzyme *Hind* III and the cleaved fragment was ligated with a  $\text{Gm}^r$  cassette that included the *aacCI* gene from plasmid pUCGm.<sup>37</sup> This gene encodes gentamycin acetyltransferase and confers resistance to gentamycin.

**The *spkF*:: $\text{Sp}^r$  mutant.** A DNA fragment of 1,677 bp that contained part of the *spkF* gene was amplified by PCR with the primers indicated in Table S1 and DNA from *Synechocystis* as template. The fragment was cloned into the pGEM®-T Easy vector. The resultant plasmid was digested with the restriction enzymes *Eco*N I and *Cla* I and the cleaved fragment was ligated with a  $\text{Sp}^r$  cassette that included the *aadA1* gene. This gene encodes aminoglycoside adenylyltransferase and confers resistance to streptomycin and spectinomycin.<sup>36</sup>

**The *spkG*:: $\text{Km}^r$  mutant.** A DNA fragment of 885 bp that contained part of the *spkG* gene was amplified by PCR with the primers indicated in Table S1 and DNA from *Synechocystis* as template. The fragment was cloned into the pUC18 vector.<sup>33</sup> The resultant

plasmid was digested with the restriction enzyme *Bam*H I and the cleaved fragment was ligated with the same Km<sup>r</sup> cassette as we used for mutation of the *spkB* gene.

**The *spkH::Sp<sup>r</sup>* mutant.** A DNA fragment of 2,022 bp that contained part of the *spkH* gene was amplified by PCR with the primers indicated in Table S1 and DNA from *Synechocystis* as template. The fragment was cloned into the pT7Blue-T vector. The resultant plasmid was digested with the restriction enzyme *Nco* I and the cleaved fragment was ligated with the same Sp<sup>r</sup> cassette as we used for mutation of the *spkF* gene.

**The *spkI::Cm<sup>r</sup>* mutant.** A cosmid clone cs0838, which contained the *spkI* gene,<sup>17</sup> was amplified in *E. coli*. A transposon that included a Cm<sup>r</sup> cassette was randomly inserted into the cs0838 cosmid using the Genomic Priming System (pGPS2.1; New England BioLabs). A *spkI::Cm<sup>r</sup>* mutant clone was selected from the resultant mutants by sequencing DNA in the region that flanked the cassette.

**The *spkJ::Cm<sup>r</sup>* mutant.** A cosmid clone cs0282, which contained the *spkJ* gene,<sup>17</sup> was amplified in *E. coli*. A transposon that included a Cm<sup>r</sup> cassette was randomly inserted into the cs0282 cosmid using the Genomic Priming System. A *spkJ::Cm<sup>r</sup>* mutant clone was selected from the resultant mutants by sequencing DNA in the region that flanked the cassette.

**The *spkK::Sp<sup>r</sup>* mutant.** A DNA fragment of 1,681 bp that contained part of the *spkK* gene was amplified by PCR with the primers indicated in Table S1 and DNA from *Synechocystis* as template. The fragment was cloned into the pT7Blue-T vector. The resultant plasmid was digested with the restriction enzyme *Nco* I and the cleaved fragment was ligated with the same Sp<sup>r</sup> cassette as we used for mutation of the *spkF* gene.

**The *spkL::Cm<sup>r</sup>* mutant.** A cosmid clone cs0352, which contained the *spkL* gene,<sup>17</sup> was amplified in *E. coli*. A transposon that included a Cm<sup>r</sup> cassette was randomly inserted into the cs0352 cosmid using the Genomic Priming System. A *spkL::Cm<sup>r</sup>* mutant clone was selected from the resultant mutants by sequencing DNA in the region that flanked the cassette.

**Table S1**

Forward and reverse primers used for amplification by PCR of partial sequences of *spk* genes and the sites of insertion and antibiotic-resistance gene cassettes used for mutation of *spk* genes of *Synechocystis*

| Gene        | ORF            | Forward and reverse primers (5'-3') for amplification by PCR | Insertional mutation |                                                  |                                   |
|-------------|----------------|--------------------------------------------------------------|----------------------|--------------------------------------------------|-----------------------------------|
|             |                |                                                              | Site <sup>1</sup>    | Restriction enzyme                               | Antibiotic-resistance cassette    |
| <i>spkB</i> | <i>slr1697</i> | TTTATCGGCATTGGGGTGTTTTTC<br>ATTGCTTGACACTCCCCTCGGTAA         | 65                   | <i>StuI</i>                                      | Km <sup>r</sup>                   |
| <i>spkC</i> | <i>slr0599</i> | ATCTAGAGGCGATCGCCCAG<br>GGGTGTCGTTGGCGTTGTAG                 | 556                  | <i>KpnI</i>                                      | Cm <sup>r</sup>                   |
| <i>spkD</i> | <i>sll0776</i> | TAATAAAAGAGTCCTGACGGAATGA<br>GATTTTAGATACATGACTTTGCCAG       | 439                  | -                                                | Tn(Km <sup>r</sup> ) <sup>2</sup> |
| <i>spkE</i> | <i>slr1443</i> | CTTTCGCCCTGACCGTATT<br>CGCCATCAAGCCCAGTAAGA                  | 332                  | <i>HindIII</i>                                   | Gm <sup>r</sup>                   |
| <i>spkF</i> | <i>slr1225</i> | CTAAGGGCAGAAACCCGCAGTC<br>CCTGGCGGAGCTTTACCCTGAT             | 157-<br>195          | <i>EcoNI</i> and<br><i>ClaI</i> 38 bp<br>deleted | Sp <sup>r</sup>                   |
| <i>spkG</i> | <i>slr0152</i> | TTATTGATGGGGATGGAG<br>CAGGGAAAAGGCTCAATG                     | 867                  | <i>BamHI</i>                                     | Km <sup>r</sup>                   |
| <i>spkH</i> | <i>sll0005</i> | TTACCACCGCCGAACAAGAT<br>AGGCTGCATTGCGGATTTTG                 | 866-<br>1352         | <i>NcoI</i> 486<br>bp deleted                    | Sp <sup>r</sup>                   |
| <i>spkI</i> | <i>sll1770</i> | CCGGGATAACCAGGGTTAACCG<br>TGGAACAAGTATGCTCGGGCCC             | 248                  | -                                                | Tn(Cm <sup>r</sup> ) <sup>2</sup> |
| <i>spkJ</i> | <i>slr0889</i> | GCCATGTGGCTCACTGGTAGCT<br>GGGTGGGGATCCGCATGGAAAA             | 138                  | -                                                | Tn(Cm <sup>r</sup> )              |
| <i>spkK</i> | <i>slr1919</i> | CCTAACCCCAAACCCCTGC<br>TGGTGCTCACGCCGGCC                     | 702                  | <i>NcoI</i>                                      | Sp <sup>r</sup>                   |
| <i>spkL</i> | <i>sll0095</i> | CCACCATCCGCATGGTAGTTGC<br>TGCCAGCGGTTTCCAAGGCTTG             | 183                  | -                                                | Tn(Cm <sup>r</sup> )              |

<sup>1</sup> Positions counted from the initiation codon.

<sup>2</sup> Tn(Km<sup>r</sup>) and Tn(Cm<sup>r</sup>) indicate transposons that included a Km<sup>r</sup> and a Cm<sup>r</sup> cassette, respectively.

**Table S2**Forward and reverse primers used for amplification by PCR of mutated *spk* genes

| Gene        | ORF            | Forward and reverse primers (5'-3')                     |
|-------------|----------------|---------------------------------------------------------|
| <i>spkB</i> | <i>slr1697</i> | AATTTATCGGCATTGGGGTGTTTTT<br>TTTGATTTTTTCACTGCGCCAAAATC |
| <i>spkC</i> | <i>slr0599</i> | AACTACTCAACAATCGCTACAGAA<br>TAAACTCTTGAGTGTAACCTTGGT    |
| <i>spkD</i> | <i>sll0776</i> | The same as in Table S1                                 |
| <i>spkE</i> | <i>slr1443</i> | TTTTGCAATATCACTTCTACTTGCC<br>GGACCATATTTTTTACTTTTGCGGA  |
| <i>spkF</i> | <i>slr1225</i> | The same as in Table S1                                 |
| <i>spkG</i> | <i>slr0152</i> | GAGATTTATGTTTGGCGGGAAAAAT<br>AAACCTTCATAGTCCAACAAAGCTA  |
| <i>spkH</i> | <i>sll0005</i> | The same as in Table S1                                 |
| <i>spkI</i> | <i>sll1770</i> | The same as in Table S1                                 |
| <i>spkJ</i> | <i>slr0889</i> | The same as in Table S1                                 |
| <i>spkK</i> | <i>slr1919</i> | The same as in Table S1                                 |
| <i>spkL</i> | <i>sll0095</i> | The same as in Table S1                                 |

### Table S3

Forward and reverse primers used for amplification by PCR of *spk* genes for cloning in pVZ321 and complementation of mutations in *spkC*, *spkF*, and *spkK*.

| Gene        | ORF            | Forward and reverse primers (5'-3')            |
|-------------|----------------|------------------------------------------------|
| <i>spkC</i> | <i>slr0599</i> | CCTAGAACAGGCTTCCTTTCC<br>CCTCTCCTCGGCTTAATATTG |
| <i>spkF</i> | <i>slr1225</i> | CTAGTACCGAAGGGTCCAAC<br>CCAAGCGGTGACCGATAG     |
| <i>spkK</i> | <i>slr1919</i> | CCATAGACCAAATCCCTG<br>GACGTTTTGTAACATCAAG      |

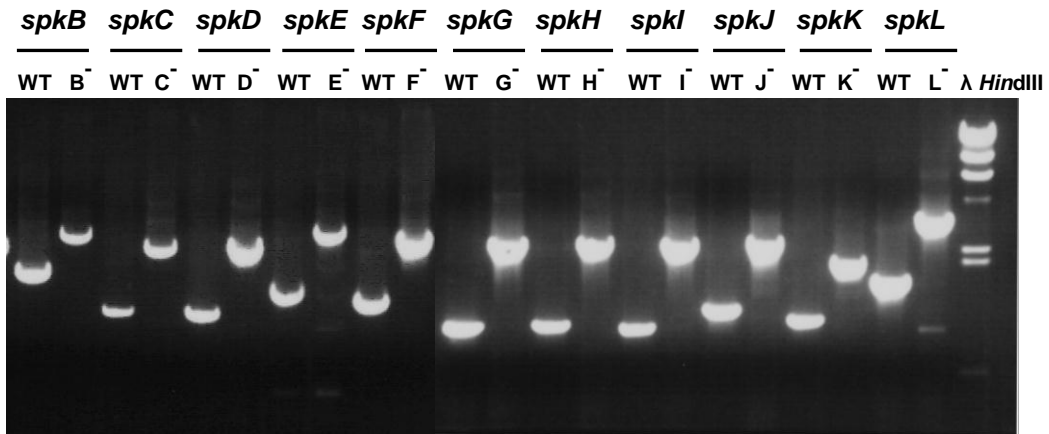

**Fig. S1.** PCR analysis of the replacement of each wild-type gene by a mutated gene in individual *spk* mutants. Chromosomal DNA was isolated from wild-type (WT) and mutant (from B<sup>-</sup> to L<sup>-</sup>) cells and used as template for PCR amplification with pairs of primers as indicated in Fig. 1 and Supplementary Table 2. A *Hind* III digest of DNA from bacteriophage  $\lambda$  is included as a size markers.

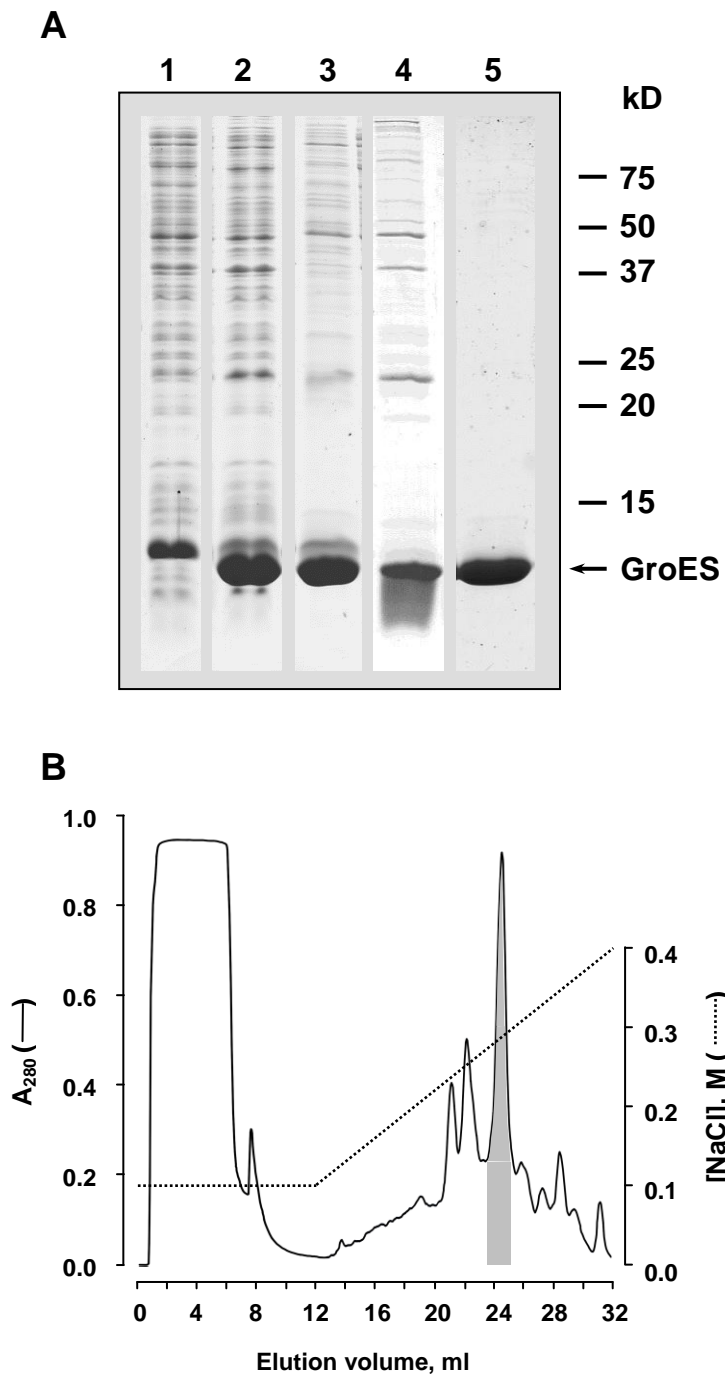

**Fig. S2.** Purification of recombinant GroES. (A) SDS-PAGE (18%) stained with Coomassie R-250 of crude lysate of non-induced *E. coli* cells carrying pET-22b with *groES* gene of *Synechocystis* (lane 1); crude lysate of induced *E. coli* cells carrying pET-22b with *groES* (lane 2); soluble protein fraction from induced *E. coli* cells (lane 3), GroES-containing protein fraction purified on Protino Ni-IDA 2000 column (lane 4), GroES purified on Mono Q column (lane 5). (B) Purification of recombinant GroES on Mono Q column. Peak of GroES is gray-shaded.



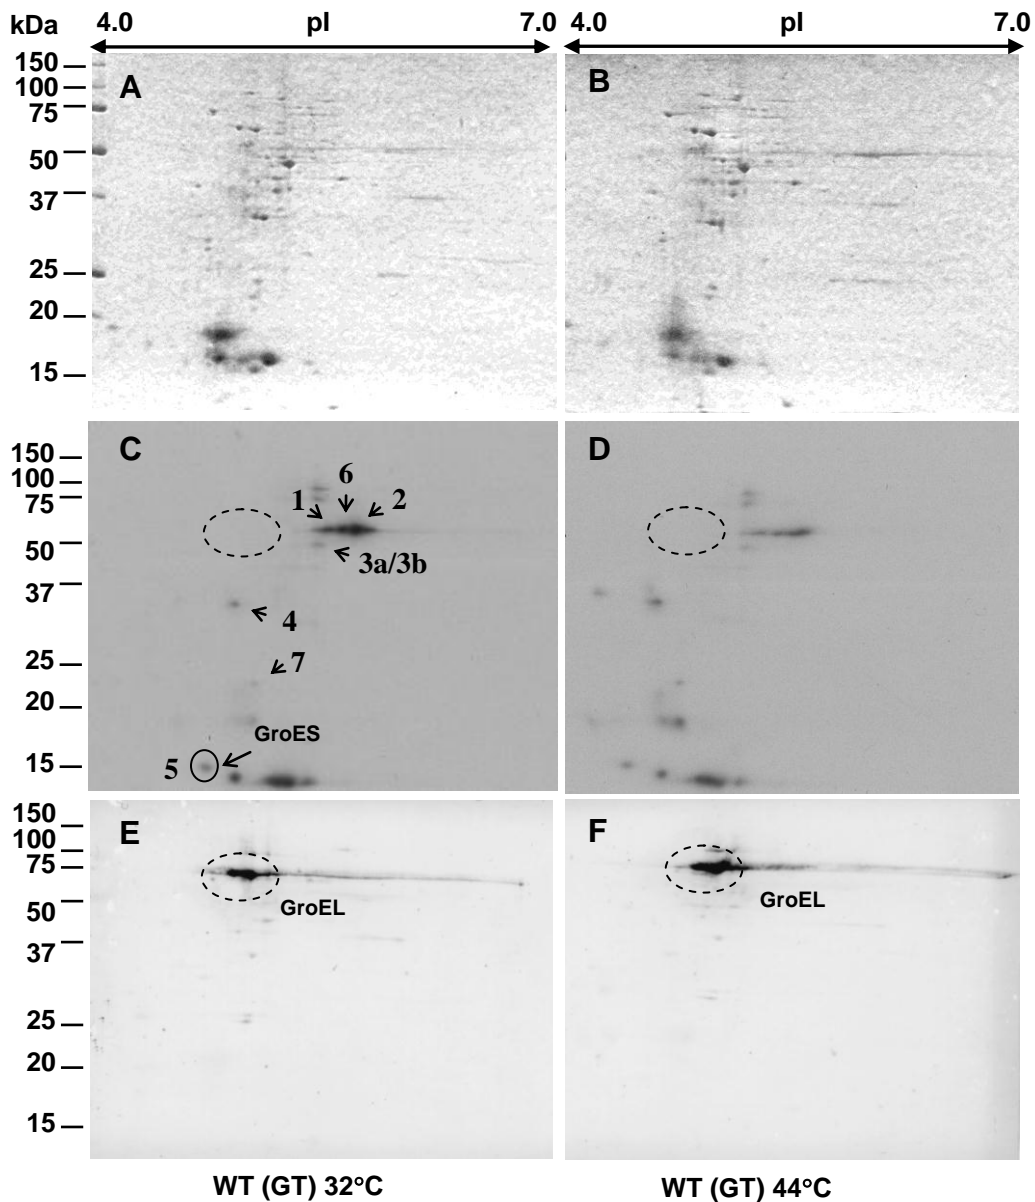

**Fig. S3.** Phosphorylation *in vitro* of a soluble protein fraction isolated from *Synechocystis* glucose tolerant (GT) strain. CBB-stained proteins from cells that had been grown at 32°C (A) and treated at 44°C for 30 min (B). Autoradiographs of phosphoprotein patterns at 32°C (C) and 44°C (D) and the corresponding western blots (E and F) developed with anti-Hsp60 (GroEL) antibodies are presented. Dashed circles designate the positions of GroEL.
